# Supplementary material for: Pediatric and adult patients with ME/CFS following COVID-19: A structured approach to diagnosis using the Munich Berlin Symptom Questionnaire (MBSQ)
Source: PubMed Central journal article supplement (PMC10951047; doi:10.1007/s00431-023-05351-z), 2023-12-14
Supplement: 431_2023_5351_MOESM2_ESM.pdf [file 431_2023_5351_MOESM2_ESM.pdf]

## Munich Berlin Symptom Questionnaire (MBSQ) – Ärztlicher Anamnesebogen für Erwachsene bei Verdacht auf Myalgische Enzephalomyelitis / Chronisches Fatigue-Syndrom (ME/CFS)

|               |                   |                  |  |
|---------------|-------------------|------------------|--|
| Name:         | Vorname:          | Name (Arzt*in):  |  |
| Geburtsdatum: |                   | Datum (Arzt*in): |  |
| Ausfülldatum: | Ausfülldauer: min | Einrichtung:     |  |

Dieser Bogen stellt die Grundlage für ein **ärztliches Gespräch** dar. **Offene Punkte** oder **Verständnisprobleme** müssen im **ärztlichen Gespräch** geklärt werden. Die **ärztliche Beurteilung** erfolgt anhand des **Auswertungsbogens für Erwachsene**. ME/CFS ist eine **klinische Diagnose**. Die **Diagnosestellung** erfordert zusätzlich zu dieser Erhebung eine **angemessene Differenzialdiagnostik**.

|  | Während der letzten 6 Monate |                                                                                |                                                                     | Ärztlicher Vermerk |
|--|------------------------------|--------------------------------------------------------------------------------|---------------------------------------------------------------------|--------------------|
|  | Liegt nicht vor              | Häufigkeit<br>1 = manchmal<br>2 = etwa ½ der Zeit<br>3 = meistens<br>4 = immer | Schwere<br>1 = mild<br>2 = moderat<br>3 = schwer<br>4 = sehr schwer |                    |

| I <b>Fatigue</b> |                                                                                   |   |         |         |
|------------------|-----------------------------------------------------------------------------------|---|---------|---------|
| 1                | Fatigue (Erschöpfung, Abgeschlagenheit, Schlaptheit, Schwäche, Mangel an Energie) | 0 | 1 2 3 4 | 1 2 3 4 |
| 2                | (Leistungs-)Einschränkungen im Alltag                                             | 0 | 1 2 3 4 | 1 2 3 4 |

| Falls Fatigue vorliegt: |                                                                                       |  |  |                                                                         |
|-------------------------|---------------------------------------------------------------------------------------|--|--|-------------------------------------------------------------------------|
| 3                       | Die Fatigue hat zu einem neuen oder bestimmten Zeitpunkt begonnen (nicht lebenslang). |  |  | <input type="radio"/> Trifft zu. <input type="radio"/> Trifft nicht zu. |
| 4                       | Die Fatigue ist <b>nicht</b> Folge von anhaltender, exzessiver Belastung.             |  |  | <input type="radio"/> Trifft zu. <input type="radio"/> Trifft nicht zu. |
| 5                       | Die Fatigue bessert sich erheblich durch Ausruhen.                                    |  |  | <input type="radio"/> Trifft zu. <input type="radio"/> Trifft nicht zu. |

| II <b>Belastungsintoleranz / belastungsinduzierte Symptomverschlechterung</b> |                                                                                                    |   |         |         |
|-------------------------------------------------------------------------------|----------------------------------------------------------------------------------------------------|---|---------|---------|
| 6                                                                             | Vermindertes geistiges oder körperliches Durchhaltevermögen                                        | 0 | 1 2 3 4 | 1 2 3 4 |
| 7                                                                             | Vermehrte Beschwerden nach alltäglichen Aktivitäten (körperlicher, geistiger oder emotionaler Art) | 0 | 1 2 3 4 | 1 2 3 4 |

| Falls Belastungsintoleranz vorliegt: |                                                                                                           |                                                                    |                                                                    |                                                                    |
|--------------------------------------|-----------------------------------------------------------------------------------------------------------|--------------------------------------------------------------------|--------------------------------------------------------------------|--------------------------------------------------------------------|
| 8                                    | Wie lange dauert es nach alltäglichen Aktivitäten bis die vermehrten Beschwerden wieder abgeklungen sind? | <input type="radio"/> ≤ 1 Std.<br><input type="radio"/> 11-13 Std. | <input type="radio"/> 2-3 Std.<br><input type="radio"/> 14-23 Std. | <input type="radio"/> 4-10 Std.<br><input type="radio"/> ≥ 24 Std. |
| 9                                    | Welche drei alltäglichen Aktivitäten führen zu vermehrten Beschwerden?                                    | 1.....                                                             | 2.....                                                             | 3.....                                                             |
| 10                                   | Welche drei Symptome verschlechtern sich nach alltäglichen Aktivitäten?                                   | 1.....                                                             | 2.....                                                             | 3.....                                                             |

| III <b>Schlaf</b> |                                   |   |         |         |
|-------------------|-----------------------------------|---|---------|---------|
| 11                | Unerholsamer Schlaf               | 0 | 1 2 3 4 | 1 2 3 4 |
| 12                | Ungewöhnlich viel Schlaf tagsüber | 0 | 1 2 3 4 | 1 2 3 4 |
| 13                | Einschlafprobleme                 | 0 | 1 2 3 4 | 1 2 3 4 |
| 14                | Durchschlafprobleme               | 0 | 1 2 3 4 | 1 2 3 4 |
| 15                | Verschiebener Tag-Nacht-Rhythmus  | 0 | 1 2 3 4 | 1 2 3 4 |

| IV <b>Schmerzen</b> |                                             |   |         |         |
|---------------------|---------------------------------------------|---|---------|---------|
| 16                  | Muskelschmerzen, muskelkaterartiges Gefühl  | 0 | 1 2 3 4 | 1 2 3 4 |
| 17                  | Gelenkschmerzen ohne Schwellung oder Rötung | 0 | 1 2 3 4 | 1 2 3 4 |
| 18                  | Kopfschmerzen                               | 0 | 1 2 3 4 | 1 2 3 4 |

|                                         | Während der letzten 6 Monate                  |                                                                                |                                                                     |         | Ärztlicher Vermerk |
|-----------------------------------------|-----------------------------------------------|--------------------------------------------------------------------------------|---------------------------------------------------------------------|---------|--------------------|
|                                         | Liegt nicht vor                               | Häufigkeit<br>1 = manchmal<br>2 = etwa ½ der Zeit<br>3 = meistens<br>4 = immer | Schwere<br>1 = mild<br>2 = moderat<br>3 = schwer<br>4 = sehr schwer |         |                    |
| <b>V Neurokognitive Manifestationen</b> |                                               |                                                                                |                                                                     |         |                    |
| 19                                      | Verwirrung                                    | 0                                                                              | 1 2 3 4                                                             | 1 2 3 4 |                    |
| 20                                      | Verlangsamtes Denken                          | 0                                                                              | 1 2 3 4                                                             | 1 2 3 4 |                    |
| 21                                      | Konzentrationsprobleme                        | 0                                                                              | 1 2 3 4                                                             | 1 2 3 4 |                    |
| 22                                      | Probleme mit dem Kurzzeitgedächtnis           | 0                                                                              | 1 2 3 4                                                             | 1 2 3 4 |                    |
| 23                                      | Orientierungsprobleme                         | 0                                                                              | 1 2 3 4                                                             | 1 2 3 4 |                    |
| 24                                      | Verständnisprobleme / Aufmerksamkeitsprobleme | 0                                                                              | 1 2 3 4                                                             | 1 2 3 4 |                    |
| 25                                      | Wortfindungsstörungen                         | 0                                                                              | 1 2 3 4                                                             | 1 2 3 4 |                    |

|    |                                                                                                                                                     |  |    |      |  |
|----|-----------------------------------------------------------------------------------------------------------------------------------------------------|--|----|------|--|
| 26 | Falls kognitive Beschwerden (V.20-25) vorliegen, verschlechtern sich diese durch Anstrengung, anhaltende aufrechte Position, Stress oder Zeitdruck? |  | Ja | Nein |  |
|----|-----------------------------------------------------------------------------------------------------------------------------------------------------|--|----|------|--|

|    |                                                                                  |   |         |         |  |
|----|----------------------------------------------------------------------------------|---|---------|---------|--|
| 27 | Wahrnehmungs-, Empfindungs- und/oder Sinnesstörungen (z.B. verschwommenes Sehen) | 0 | 1 2 3 4 | 1 2 3 4 |  |
| 28 | Koordinationsschwierigkeiten                                                     | 0 | 1 2 3 4 | 1 2 3 4 |  |
| 29 | Muskelzuckungen                                                                  | 0 | 1 2 3 4 | 1 2 3 4 |  |
| 30 | Muskelschwäche                                                                   | 0 | 1 2 3 4 | 1 2 3 4 |  |
| 31 | Lichtempfindlichkeit                                                             | 0 | 1 2 3 4 | 1 2 3 4 |  |
| 32 | Geräuschempfindlichkeit                                                          | 0 | 1 2 3 4 | 1 2 3 4 |  |
| 33 | Berührungsempfindlichkeit                                                        | 0 | 1 2 3 4 | 1 2 3 4 |  |
| 34 | Überlastung durch positive und / oder negative Emotionen                         | 0 | 1 2 3 4 | 1 2 3 4 |  |

| <b>VI Autonome Manifestationen</b> |                                          |   |         |         |  |
|------------------------------------|------------------------------------------|---|---------|---------|--|
| 35                                 | Schwindel / Benommenheit                 | 0 | 1 2 3 4 | 1 2 3 4 |  |
| 36                                 | Herzklopfen / Herzrasen                  | 0 | 1 2 3 4 | 1 2 3 4 |  |
| 37                                 | Kreislaufprobleme beim Aufrichten        | 0 | 1 2 3 4 | 1 2 3 4 |  |
| 38                                 | Kreislaufprobleme in aufrechter Position | 0 | 1 2 3 4 | 1 2 3 4 |  |
| 39                                 | Ungewohnte Blässe                        | 0 | 1 2 3 4 | 1 2 3 4 |  |
| 40                                 | Blasenprobleme                           | 0 | 1 2 3 4 | 1 2 3 4 |  |
| 41                                 | Magen-Darm-Probleme                      | 0 | 1 2 3 4 | 1 2 3 4 |  |
| 42                                 | Belastungsabhängige Atembeschwerden      | 0 | 1 2 3 4 | 1 2 3 4 |  |

| <b>VII Neuroendokrine Manifestationen</b> |                                                                                                                                     |   |         |         |  |
|-------------------------------------------|-------------------------------------------------------------------------------------------------------------------------------------|---|---------|---------|--|
| 43                                        | Temperaturregulationsstörung (z.B. erniedrigte Temperatur, Temperaturschwankungen, Schwitzen, fiebriges Gefühl, kalte Hände / Füße) | 0 | 1 2 3 4 | 1 2 3 4 |  |
| 44                                        | Unverträglichkeit von extremer Hitze / Kälte                                                                                        | 0 | 1 2 3 4 | 1 2 3 4 |  |
| 45                                        | Gewichtsveränderung bei Appetitveränderung                                                                                          | 0 | 1 2 3 4 | 1 2 3 4 |  |
| 46                                        | Symptomverschlechterung bei Stress                                                                                                  | 0 | 1 2 3 4 | 1 2 3 4 |  |

| <b>VIII Immunologische Manifestationen</b> |                                                                               |   |         |         |  |
|--------------------------------------------|-------------------------------------------------------------------------------|---|---------|---------|--|
| 47                                         | Grippiges Gefühl / generelles Krankheitsgefühl                                | 0 | 1 2 3 4 | 1 2 3 4 |  |
| 48                                         | Schmerzhafte / empfindliche Lymphknoten                                       | 0 | 1 2 3 4 | 1 2 3 4 |  |
| 49                                         | Wiederkehrende Halsschmerzen                                                  | 0 | 1 2 3 4 | 1 2 3 4 |  |
| 50                                         | Neue Empfindlichkeit gegenüber Lebensmitteln, Medikamenten, Chemikalien, etc. | 0 | 1 2 3 4 | 1 2 3 4 |  |

| <b>Hauptsymptome</b>                                                                          |  |        |  |  |  |
|-----------------------------------------------------------------------------------------------|--|--------|--|--|--|
| Falls bei Ihnen mehr als drei der genannten Symptome vorliegen, welche stehen im Vordergrund? |  | 1..... |  |  |  |
|                                                                                               |  | 2..... |  |  |  |
|                                                                                               |  | 3..... |  |  |  |

**Munich Berlin Symptom Questionnaire (MBSQ)**  
**– Auswertungsbogen für Erwachsene (≥ 18 Jahre)**  
**bei Verdacht auf ME/CFS**

|               |          |                  |
|---------------|----------|------------------|
| Name:         | Vorname: | Name (Arzt*in):  |
| Geburtsdatum: |          | Datum (Arzt*in): |
| Ausfülldatum: |          | Einrichtung:     |

Nur wenn nach ärztlicher Beurteilung Häufigkeit **und** Schweregrad mit  $\geq 2$  angegeben werden, geht der jeweilige Punkt positiv in die Auswertung ein.  
ME/CFS ist eine Ausschlussdiagnose, die im Falle neuer klinischer Aspekte reevaluiert werden muss.

| Kanadische Konsensus-Kriterien (CCC) <sup>1</sup> |                                                                                                                                                                                                                                                                                                                                                                                                                                                                                                        | Kriterien des Institute of Medicine (IOM) <sup>2</sup> |                                                                                                                                                                                                                                                                                                                                                                                                                                                                                         |
|---------------------------------------------------|--------------------------------------------------------------------------------------------------------------------------------------------------------------------------------------------------------------------------------------------------------------------------------------------------------------------------------------------------------------------------------------------------------------------------------------------------------------------------------------------------------|--------------------------------------------------------|-----------------------------------------------------------------------------------------------------------------------------------------------------------------------------------------------------------------------------------------------------------------------------------------------------------------------------------------------------------------------------------------------------------------------------------------------------------------------------------------|
| <b>O</b>                                          | <b>Krankheitsdauer (Tag des Krankheitsbeginns: __.__.____)</b><br>Die Symptomatik besteht seit mindestens <b>6 Monaten</b> .                                                                                                                                                                                                                                                                                                                                                                           | <b>O</b>                                               | <b>Krankheitsdauer (Tag des Krankheitsbeginns: __.__.____)</b><br>Die Symptomatik besteht seit mindestens <b>6 Monaten</b> .                                                                                                                                                                                                                                                                                                                                                            |
| <b>O</b>                                          | <b>Anamnese, körperliche Untersuchung und Differentialdiagnostik</b><br><input type="checkbox"/> ergaben keinen Anhalt für eine andere Ursache der Beschwerden<br>(insbes. kein Anhalt für <i>M. Addison, M. Cushing, Hypo-/ Hyperthyreose, Anämie, Hämochromatose, Diabetes mellitus, hämatoonkologische, rheumatologische und behandelbare Schlafkrankungen</i> )<br><br><input type="checkbox"/> Die Symptome bestehen erst seit Erkrankungsbeginn oder haben in Häufigkeit und Schwere zugenommen. | <b>O</b>                                               | <b>Anamnese, körperliche Untersuchung und Differentialdiagnostik</b><br><input type="checkbox"/> ergaben keinen Anhalt für eine andere Ursache der Beschwerden<br><br><input type="checkbox"/> Die Symptome bestehen erst seit Erkrankungsbeginn oder haben in Häufigkeit und Schwere zugenommen.                                                                                                                                                                                       |
| <b>O</b>                                          | <b>Fatigue</b><br>alle nachfolgenden Punkte müssen erfüllt sein:<br><input type="checkbox"/> Fatigue: <b>I.1</b> $\geq 2$<br><input type="checkbox"/> Einschränkungen: <b>I.2</b> $\geq 2$<br><input type="checkbox"/> Fatigue neu begonnen: <b>I.3</b> Trifft zu.                                                                                                                                                                                                                                     | <b>O</b>                                               | <b>Fatigue</b><br>alle nachfolgenden Punkte müssen erfüllt sein:<br><input type="checkbox"/> Fatigue: <b>I.1</b> $\geq 2$<br><input type="checkbox"/> Einschränkungen: <b>I.2</b> $\geq 2$<br><input type="checkbox"/> Fatigue neu begonnen: <b>I.3</b> Trifft zu.<br><input type="checkbox"/> Fatigue ist nicht Folge von anhaltender, exzessiver Belastung: <b>I.4</b> Trifft zu.<br><input type="checkbox"/> Fatigue erheblich gebessert durch Ausruhen: <b>I.5</b> Trifft nicht zu. |
| <b>O</b>                                          | <b>Belastungsintoleranz</b><br>alle nachfolgenden Punkte müssen erfüllt sein:<br><input type="checkbox"/> Beschwerdezunahme nach Aktivitäten; vermind. Durchhalteverm.: alle 2 Punkte <b>II.6-7</b> $\geq 2$<br><input type="checkbox"/> Zustandsverschlechterung: <b>II.8</b> $\geq 14$ Std.*                                                                                                                                                                                                         | <b>O</b>                                               | <b>Belastungsintoleranz</b><br>alle 2 nachfolgenden Punkte müssen erfüllt sein: <b>II.6-7</b> $\geq 2$                                                                                                                                                                                                                                                                                                                                                                                  |

| Kanadische Konsensus-Kriterien (CCC) <sup>1</sup> |                                                                                                                                                                                                                                                                                                                                                                                                                                                                                                                                                                                                                                                                             | Kriterien des Institute of Medicine (IOM) <sup>2</sup> |                                                                                                                                                                                                                                                                                                                                                                                                                                                                                                           |
|---------------------------------------------------|-----------------------------------------------------------------------------------------------------------------------------------------------------------------------------------------------------------------------------------------------------------------------------------------------------------------------------------------------------------------------------------------------------------------------------------------------------------------------------------------------------------------------------------------------------------------------------------------------------------------------------------------------------------------------------|--------------------------------------------------------|-----------------------------------------------------------------------------------------------------------------------------------------------------------------------------------------------------------------------------------------------------------------------------------------------------------------------------------------------------------------------------------------------------------------------------------------------------------------------------------------------------------|
| <b>O</b>                                          | <b>Schlaf</b><br>mind. 1 der nachfolgenden 5 Punkte muss erfüllt sein: <b>III.11-15</b> ≥2                                                                                                                                                                                                                                                                                                                                                                                                                                                                                                                                                                                  | <b>O</b>                                               | <b>Schlaf</b><br>der nachfolgende Punkt muss erfüllt sein: <b>III.11</b> ≥2                                                                                                                                                                                                                                                                                                                                                                                                                               |
| <b>O</b>                                          | <b>Schmerzen</b><br>mind. 1 der nachfolgenden 3 Punkte muss erfüllt sein: <b>IV.16-18</b> ≥2                                                                                                                                                                                                                                                                                                                                                                                                                                                                                                                                                                                |                                                        | <b>Schmerzen</b><br><i>nicht in IOM-Kriterien berücksichtigt</i>                                                                                                                                                                                                                                                                                                                                                                                                                                          |
| <b>O</b>                                          | <b>Neurokognitive Manifestationen</b><br>mind. 2 der nachfolgenden Symptomgruppen müssen erfüllt sein:<br><input type="checkbox"/> Verwirrung: <b>V.19</b> ≥2<br><input type="checkbox"/> Konzentration u/o Gedächtnis: 1 der 2 nachfolgenden Punkte: <b>V.21-22</b> ≥2<br><input type="checkbox"/> Orientierung: <b>V.23</b> ≥2<br><input type="checkbox"/> Verständnis u/o Wortfindung: 1 der 2 nachfolgenden Punkte: <b>V.24-25</b> ≥2<br><input type="checkbox"/> Wahrnehmung und Überlastungsphänomene: 1 der 5 nachfolgenden Punkte: <b>V.27, V.31-34</b> ≥2<br><input type="checkbox"/> Koordination und Muskulatur: 1 der 3 nachfolgenden Punkte: <b>V.28-30</b> ≥2 | <b>O</b>                                               | <b>Neurokognitive und autonome Manifestationen</b><br>mind. 1 der folgenden 2 Kategorien muss erfüllt sein:<br><input type="checkbox"/> die folgenden beiden Symptomgruppen müssen erfüllt sein:<br><input type="checkbox"/> mind. 1 der nachfolgenden 6 Punkte muss erfüllt sein: <b>V.20-22, V.24-25, V.28</b> ≥2<br><input type="checkbox"/> der folgende Punkt muss erfüllt sein: <b>V.26</b> Ja<br><input type="checkbox"/> Mind. 1 der nachfolgenden 2 Punkte muss erfüllt sein: <b>VI.37-38</b> ≥2 |
| <b>O</b>                                          | <b>Autonome, neuroendokrine und immunologische Manifestationen</b><br>mind. 2 der 3 Kategorien müssen erfüllt sein:<br><input type="checkbox"/> mind. 1 der nachfolgenden 8 Punkte muss erfüllt sein: <b>VI.35-42</b> ≥2<br><input type="checkbox"/> mind. 1 der nachfolgenden 4 Punkte muss erfüllt sein: <b>VII.43-46</b> ≥2<br><input type="checkbox"/> mind. 1 der nachfolgenden 4 Punkte muss erfüllt sein: <b>VIII.47-50</b> ≥2                                                                                                                                                                                                                                       |                                                        | <b>Neuroendokrine und immunologische Manifestationen</b><br><i>nicht in IOM-Kriterien berücksichtigt</i>                                                                                                                                                                                                                                                                                                                                                                                                  |

|                                                                                         |                                                                       |
|-----------------------------------------------------------------------------------------|-----------------------------------------------------------------------|
| <b>O Patient*in erfüllt die Kanadischen Konsensus-Kriterien für ME/CFS</b>              | <b>O Patient*in erfüllt die IOM-Kriterien für ME/CFS</b>              |
| <b>O Patient*in erfüllt <u>nicht</u> die Kanadischen Konsensus-Kriterien für ME/CFS</b> | <b>O Patient*in erfüllt <u>nicht</u> die IOM-Kriterien für ME/CFS</b> |

<sup>1</sup> Carruthers BM, Jain AK, De Meirleir KL, Peterson DL, Klimas NG, Lerner, AM, Bested AC, Flor-Henry P, Joshi P, Powles ACP, Sherkey JA, van de Sande MI. Myalgic Encephalomyelitis/Chronic Fatigue Syndrome. Journal of Chronic Fatigue Syndrome 2003;11:7-115. doi: 10.1300/J092v11n01\_02.

<sup>2</sup> Clayton EW. Beyond Myalgic Encephalomyelitis/Chronic Fatigue Syndrome: An IOM Report on Redefining an Illness. JAMA. 2015;313(11):1101–1102. doi:10.1001/jama.2015.1346

\* In der Originalpublikation von Carruthers BM et al.<sup>1</sup> ist eine PEM-Dauer von >24 Stunden gefordert. Nach aktuellem internationalen Forschungsstand empfehlen wir jedoch die Diagnosestellung schon ab einer PEM-Dauer von ≥14 Stunden, siehe

a) Cotler J, Holtzman C, Dudun C, Jason LA. A Brief Questionnaire to Assess Post-Exertional Malaise. Diagnostics. 2018; 8(3):66. doi.org/10.3390/diagnostics8030066

b) Kedor C, Freitag H, Meyer-Armdt L, Wittke K, Hanitsch LG, Zoller T, Steinbeis F, Häffke M, Rudolf G, Heidecker B, Bobbert T, Spranger J, Volk HD, Skurk C, Konietzschke F, Paul F, Behrends U, Bellmann-Strobl J, Scheibenbogen C.

A prospective observational study of post-COVID-19 chronic fatigue syndrome following the first pandemic wave in Germany and biomarkers associated with symptom severity. Nat Commun. 2022;13(1):5104.

doi: 10.1038/s41467-022-32507-6. Erratum in: Nat Commun. 2022;13(1):6009.

## Munich Berlin Symptom Questionnaire (MBSQ) – Ärztlicher Anamnesebogen für Kinder und Jugendliche bei Verdacht auf Myalgische Enzephalomyelitis / Chronisches Fatigue-Syndrom (ME/CFS)

|               |                   |
|---------------|-------------------|
| Name:         | Vorname:          |
| Geburtsdatum: |                   |
| Ausfülldatum: | Ausfülldauer: min |

|                  |
|------------------|
| Name (Arzt*in):  |
| Datum (Arzt*in): |
| Einrichtung:     |

Für Patient\*innen: Bitte fülle den Fragebogen, soweit möglich, alleine aus und lasse Dir, falls nötig, von Deinen Eltern helfen.

Für Ärzt\*innen: Dieser Bogen stellt die Grundlage für ein **ärztliches Gespräch** dar. **Offene Punkte** oder **Verständnisprobleme** müssen im **ärztlichen Gespräch** geklärt werden. Die **ärztliche Beurteilung** erfolgt anhand des **Auswertungsbogens für Kinder und Jugendliche**. ME/CFS ist eine **klinische Diagnose**. Die **Diagnosestellung** erfordert zusätzlich zu dieser Erhebung eine **angemessene Differenzialdiagnostik**.

|  | Während der letzten 3 Monate |                                                                                |                                                                     |  | Ärztlicher Vermerk |
|--|------------------------------|--------------------------------------------------------------------------------|---------------------------------------------------------------------|--|--------------------|
|  | Liegt nicht vor              | Häufigkeit<br>1 = manchmal<br>2 = etwa ½ der Zeit<br>3 = meistens<br>4 = immer | Schwere<br>1 = mild<br>2 = moderat<br>3 = schwer<br>4 = sehr schwer |  |                    |

| I Fatigue |                                                                                   |   |         |         |  |
|-----------|-----------------------------------------------------------------------------------|---|---------|---------|--|
| 1         | Fatigue (Erschöpfung, Abgeschlagenheit, Schlaptheit, Schwäche, Mangel an Energie) | 0 | 1 2 3 4 | 1 2 3 4 |  |
| 2         | Einschränkungen im Alltag – Schule / Ausbildung                                   | 0 | 1 2 3 4 | 1 2 3 4 |  |
| 3         | Einschränkungen im Alltag – Sozial (Freunde, Familie)                             | 0 | 1 2 3 4 | 1 2 3 4 |  |
| 4         | Einschränkungen im Alltag – Persönlich (Selbst)                                   | 0 | 1 2 3 4 | 1 2 3 4 |  |

| Falls Fatigue vorliegt: |                                                                                       |                                                                         |  |  |
|-------------------------|---------------------------------------------------------------------------------------|-------------------------------------------------------------------------|--|--|
| 5                       | Die Fatigue hat zu einem neuen oder bestimmten Zeitpunkt begonnen (nicht lebenslang). | <input type="radio"/> Trifft zu. <input type="radio"/> Trifft nicht zu. |  |  |
| 6                       | Die Fatigue ist <b>nicht</b> Folge von anhaltender, exzessiver Belastung.             | <input type="radio"/> Trifft zu. <input type="radio"/> Trifft nicht zu. |  |  |
| 7                       | Die Fatigue bessert sich deutlich durch Ausruhen.                                     | <input type="radio"/> Trifft zu. <input type="radio"/> Trifft nicht zu. |  |  |

| II Belastungsintoleranz / belastungsinduzierte Symptomverschlechterung |                                                                                                    |   |         |         |  |
|------------------------------------------------------------------------|----------------------------------------------------------------------------------------------------|---|---------|---------|--|
| 8                                                                      | Vermindertes geistiges oder körperliches Durchhaltevermögen                                        | 0 | 1 2 3 4 | 1 2 3 4 |  |
| 9                                                                      | Vermehrte Beschwerden nach alltäglichen Aktivitäten (körperlicher, geistiger oder emotionaler Art) | 0 | 1 2 3 4 | 1 2 3 4 |  |

| Falls Belastungsintoleranz vorliegt: |                                                                                                           |                                                                    |                                                                    |                                                                    |  |
|--------------------------------------|-----------------------------------------------------------------------------------------------------------|--------------------------------------------------------------------|--------------------------------------------------------------------|--------------------------------------------------------------------|--|
| 10                                   | Wie lange dauert es nach alltäglichen Aktivitäten bis die vermehrten Beschwerden wieder abgeklungen sind? | <input type="radio"/> ≤ 1 Std.<br><input type="radio"/> 11-13 Std. | <input type="radio"/> 2-3 Std.<br><input type="radio"/> 14-23 Std. | <input type="radio"/> 4-10 Std.<br><input type="radio"/> ≥ 24 Std. |  |
| 11                                   | Welche drei alltäglichen Aktivitäten führen zu vermehrten Beschwerden?                                    | 1.....<br>2.....<br>3.....                                         |                                                                    |                                                                    |  |
| 12                                   | Welche drei Symptome verschlechtern sich nach alltäglichen Aktivitäten?                                   | 1.....<br>2.....<br>3.....                                         |                                                                    |                                                                    |  |

| III Schlaf |                                   |   |         |         |  |
|------------|-----------------------------------|---|---------|---------|--|
| 13         | Unerholsamer Schlaf               | 0 | 1 2 3 4 | 1 2 3 4 |  |
| 14         | Ungewöhnlich viel Schlaf tagsüber | 0 | 1 2 3 4 | 1 2 3 4 |  |
| 15         | Einschlafprobleme                 | 0 | 1 2 3 4 | 1 2 3 4 |  |
| 16         | Durchschlafprobleme               | 0 | 1 2 3 4 | 1 2 3 4 |  |
| 17         | Verschobener Tag-Nacht-Rhythmus   | 0 | 1 2 3 4 | 1 2 3 4 |  |

| IV Schmerzen |                                             |   |         |         |  |
|--------------|---------------------------------------------|---|---------|---------|--|
| 18           | Muskelschmerzen, muskelkaterartiges Gefühl  | 0 | 1 2 3 4 | 1 2 3 4 |  |
| 19           | Gelenkschmerzen ohne Schwellung oder Rötung | 0 | 1 2 3 4 | 1 2 3 4 |  |
| 20           | Kopfschmerzen                               | 0 | 1 2 3 4 | 1 2 3 4 |  |
| 21           | Bauchschmerzen                              | 0 | 1 2 3 4 | 1 2 3 4 |  |

|                                         | Während der letzten 3 Monate                                                                                                                        |                                                                                |                                                                     | Ärztlicher Vermerk |  |
|-----------------------------------------|-----------------------------------------------------------------------------------------------------------------------------------------------------|--------------------------------------------------------------------------------|---------------------------------------------------------------------|--------------------|--|
|                                         | Liegt nicht vor                                                                                                                                     | Häufigkeit<br>1 = manchmal<br>2 = etwa ½ der Zeit<br>3 = meistens<br>4 = immer | Schwere<br>1 = mild<br>2 = moderat<br>3 = schwer<br>4 = sehr schwer |                    |  |
| <b>V Neurokognitive Manifestationen</b> |                                                                                                                                                     |                                                                                |                                                                     |                    |  |
| 22                                      | Verwirrung                                                                                                                                          | 0                                                                              | 1 2 3 4                                                             | 1 2 3 4            |  |
| 23                                      | Verlangsamtes Denken                                                                                                                                | 0                                                                              | 1 2 3 4                                                             | 1 2 3 4            |  |
| 24                                      | Konzentrationsprobleme                                                                                                                              | 0                                                                              | 1 2 3 4                                                             | 1 2 3 4            |  |
| 25                                      | Probleme mit dem Kurzzeitgedächtnis                                                                                                                 | 0                                                                              | 1 2 3 4                                                             | 1 2 3 4            |  |
| 26                                      | Orientierungsprobleme                                                                                                                               | 0                                                                              | 1 2 3 4                                                             | 1 2 3 4            |  |
| 27                                      | Verständnisprobleme / Aufmerksamkeitsprobleme                                                                                                       | 0                                                                              | 1 2 3 4                                                             | 1 2 3 4            |  |
| 28                                      | Wortfindungsstörungen                                                                                                                               | 0                                                                              | 1 2 3 4                                                             | 1 2 3 4            |  |
| 29                                      | Falls kognitive Beschwerden (V.23-28) vorliegen, verschlechtern sich diese durch Anstrengung, anhaltende aufrechte Position, Stress oder Zeitdruck? |                                                                                |                                                                     | Ja Nein            |  |
| 30                                      | Geistesabwesenheit                                                                                                                                  | 0                                                                              | 1 2 3 4                                                             | 1 2 3 4            |  |
| 31                                      | Schwierigkeiten, Informationen abzurufen                                                                                                            | 0                                                                              | 1 2 3 4                                                             | 1 2 3 4            |  |
| 32                                      | Mangelnde Multitaskingfähigkeit                                                                                                                     | 0                                                                              | 1 2 3 4                                                             | 1 2 3 4            |  |
| 33                                      | Schwierigkeiten beim Ausdrücken von Gedanken                                                                                                        | 0                                                                              | 1 2 3 4                                                             | 1 2 3 4            |  |
| 34                                      | Beim Denken oft den Faden verlieren                                                                                                                 | 0                                                                              | 1 2 3 4                                                             | 1 2 3 4            |  |
| 35                                      | Neue Schulprobleme (z.B. in Mathematik)                                                                                                             | 0                                                                              | 1 2 3 4                                                             | 1 2 3 4            |  |
| 36                                      | Wahrnehmungs-, Empfindungs- und/oder Sinnesstörungen (z.B. verschwommenes Sehen)                                                                    | 0                                                                              | 1 2 3 4                                                             | 1 2 3 4            |  |
| 37                                      | Koordinationsschwierigkeiten                                                                                                                        | 0                                                                              | 1 2 3 4                                                             | 1 2 3 4            |  |
| 38                                      | Muskelzuckungen                                                                                                                                     | 0                                                                              | 1 2 3 4                                                             | 1 2 3 4            |  |
| 39                                      | Muskelschwäche                                                                                                                                      | 0                                                                              | 1 2 3 4                                                             | 1 2 3 4            |  |
| 40                                      | Lichtempfindlichkeit                                                                                                                                | 0                                                                              | 1 2 3 4                                                             | 1 2 3 4            |  |
| 41                                      | Geräuschempfindlichkeit                                                                                                                             | 0                                                                              | 1 2 3 4                                                             | 1 2 3 4            |  |
| 42                                      | Berührungsempfindlichkeit                                                                                                                           | 0                                                                              | 1 2 3 4                                                             | 1 2 3 4            |  |
| 43                                      | Überlastung durch positive und/oder negative Emotionen                                                                                              | 0                                                                              | 1 2 3 4                                                             | 1 2 3 4            |  |

| <b>VI Autonome Manifestationen</b> |                                          |   |         |         |  |
|------------------------------------|------------------------------------------|---|---------|---------|--|
| 44                                 | Schwindel / Benommenheit                 | 0 | 1 2 3 4 | 1 2 3 4 |  |
| 45                                 | Herzklopfen / Herzrasen                  | 0 | 1 2 3 4 | 1 2 3 4 |  |
| 46                                 | Kreislaufprobleme beim Aufrichten        | 0 | 1 2 3 4 | 1 2 3 4 |  |
| 47                                 | Kreislaufprobleme in aufrechter Position | 0 | 1 2 3 4 | 1 2 3 4 |  |
| 48                                 | Ungewohnte Blässe                        | 0 | 1 2 3 4 | 1 2 3 4 |  |
| 49                                 | Blasenprobleme                           | 0 | 1 2 3 4 | 1 2 3 4 |  |
| 50                                 | Magen-Darm-Probleme                      | 0 | 1 2 3 4 | 1 2 3 4 |  |
| 51                                 | Belastungsabhängige Atembeschwerden      | 0 | 1 2 3 4 | 1 2 3 4 |  |

| <b>VII Neuroendokrine Manifestationen</b> |                                                                                                                                    |   |         |         |  |
|-------------------------------------------|------------------------------------------------------------------------------------------------------------------------------------|---|---------|---------|--|
| 52                                        | Temperaturregulationsstörung (z.B. erniedrigte Temperatur, Temperaturschwankungen, Schwitzen, fiebriges Gefühl, kalte Hände/ Füße) | 0 | 1 2 3 4 | 1 2 3 4 |  |
| 53                                        | Unverträglichkeit von extremer Hitze / Kälte                                                                                       | 0 | 1 2 3 4 | 1 2 3 4 |  |
| 54                                        | Gewichtsveränderung bei Appetitveränderung                                                                                         | 0 | 1 2 3 4 | 1 2 3 4 |  |
| 55                                        | Symptomverschlechterung bei Stress                                                                                                 | 0 | 1 2 3 4 | 1 2 3 4 |  |

| <b>VIII Immunologische Manifestationen</b> |                                                                               |   |         |         |  |
|--------------------------------------------|-------------------------------------------------------------------------------|---|---------|---------|--|
| 56                                         | Grippiges Gefühl / generelles Krankheitsgefühl                                | 0 | 1 2 3 4 | 1 2 3 4 |  |
| 57                                         | Schmerzhafte/ empfindliche Lymphknoten                                        | 0 | 1 2 3 4 | 1 2 3 4 |  |
| 58                                         | Fieber                                                                        | 0 | 1 2 3 4 | 1 2 3 4 |  |
| 59                                         | Wiederkehrende Halsschmerzen                                                  | 0 | 1 2 3 4 | 1 2 3 4 |  |
| 60                                         | Neue Empfindlichkeit gegenüber Lebensmitteln, Medikamenten, Chemikalien, etc. | 0 | 1 2 3 4 | 1 2 3 4 |  |

| <b>Sonstige Fragen zum Symptomverlauf</b>                                                   |                            |
|---------------------------------------------------------------------------------------------|----------------------------|
| Falls bei Dir mehr als drei der genannten Symptome vorliegen, welche stehen im Vordergrund? | 1.....<br>2.....<br>3..... |

**Munich Berlin Symptom Questionnaire (MBSQ) –  
Auswertungsbogen Nr. 1 für Kinder und Jugendliche (0-17 Jahre)  
bei Verdacht auf ME/CFS**

|               |          |                  |
|---------------|----------|------------------|
| Name:         | Vorname: | Name (Arzt*in):  |
| Geburtsdatum: |          | Datum (Arzt*in): |
| Ausfülldatum: |          | Einrichtung:     |

Nur wenn nach ärztlicher Beurteilung Häufigkeit **und** Schweregrad mit  $\geq 2$  angegeben werden, geht der jeweilige Punkt positiv in die Auswertung ein.  
ME/CFS ist eine Ausschlussdiagnose, die im Falle neuer klinischer Aspekte reevaluiert werden muss.

| Pädiatrische Falldefinition für ME/CFS nach Jason LA et al. <sup>1</sup> |                                                                                                                                                                                                                                                                                                                                                                                                                                                                                                                                                                                                | Klinisch-diagnostisches Arbeitsblatt nach Rowe PC et al. <sup>2</sup> |                                                                                                                                                                                                                                                                                                                                                                                                                                                                                                                                                                                                                                         |
|--------------------------------------------------------------------------|------------------------------------------------------------------------------------------------------------------------------------------------------------------------------------------------------------------------------------------------------------------------------------------------------------------------------------------------------------------------------------------------------------------------------------------------------------------------------------------------------------------------------------------------------------------------------------------------|-----------------------------------------------------------------------|-----------------------------------------------------------------------------------------------------------------------------------------------------------------------------------------------------------------------------------------------------------------------------------------------------------------------------------------------------------------------------------------------------------------------------------------------------------------------------------------------------------------------------------------------------------------------------------------------------------------------------------------|
| <b>O</b>                                                                 | <b>Krankheitsdauer (Tag des Krankheitsbeginns: __.__.____)</b><br><input type="checkbox"/> Die Symptomatik besteht seit mindestens <b>3 Monaten</b> .                                                                                                                                                                                                                                                                                                                                                                                                                                          | <b>O</b>                                                              | <b>Krankheitsdauer (Tag des Krankheitsbeginns: __.__.____)</b><br><input type="checkbox"/> Die Symptomatik besteht seit mindestens <b>3 Monaten</b> .*                                                                                                                                                                                                                                                                                                                                                                                                                                                                                  |
| <b>O</b>                                                                 | <b>Anamnese, körperliche Untersuchung und Differentialdiagnostik</b><br>ergaben keinen Anhalt für eine andere Ursache der Beschwerden<br>(insbesondere kein Anhalt für <i>unbehandelte Hypothyreose, Schlafapnoe, Narkolepsie, maligne Erkrankungen, Leukämie, Hepatitis, Multiple Sklerose, Juvenile rheumatoide Arthritis, systemischer Lupus erythematodes, HIV/AIDS, schwere Adipositas (BMI&gt;40), Zöliakie, Borreliose, kindliche Schizophrenie oder psychotische Störungen, Bipolare Störung, Aktiver Alkohol oder –Substanzmissbrauch, aktive Anorexie oder Bulimie, Depression</i> ) | <b>O</b>                                                              | <b>Anamnese, körperliche Untersuchung und Differentialdiagnostik</b><br>ergaben keinen Anhalt für eine andere Ursache der Beschwerden<br>(insbesondere kein Anhalt für <i>NNR-Insuffizienz, Übertrainingssyndrom, GI-Störungen: Zöliakie, Reizdarmsyndrom, eosinophile Gastroenteritis, Chiari Malformation, zervikale Spinalkanalstenose, Neuroborreliose oder andere durch Zecken übertragbare Erkrankungen, Depression, Narkolepsie, obstruktive oder zentrale Schlafapnoe, post-komotionelles Syndrom, schwere Anämie, systemischer Lupus erythematodes und ähnliche Autoimmunerkrankungen, unbehandelte Hypo-/ Hyperthyreose</i> ) |
| <b>O</b>                                                                 | <b>Fatigue</b><br>alle nachfolgenden Punkte müssen erfüllt sein:<br><input type="checkbox"/> Fatigue: <b>I.1</b> $\geq 2$<br><input type="checkbox"/> Einschränkungen: alle 3 Punkte: <b>I.2-4</b> $\geq 2$<br><input type="checkbox"/> Fatigue ist nicht Folge von anhaltender, exzessiver Belastung: <b>I.6</b> Trifft zu.<br><input type="checkbox"/> Fatigue erheblich gebessert durch Ausruhen: <b>I.7</b> Trifft nicht zu.                                                                                                                                                               | <b>O</b>                                                              | <b>Fatigue</b><br>alle nachfolgenden Punkte müssen erfüllt sein:<br><input type="checkbox"/> Fatigue: <b>I.1</b> $\geq 2$<br><input type="checkbox"/> Einschränkungen: mind. 1 der 3 Punkte: <b>I.2-4</b> $\geq 2$<br><input type="checkbox"/> Fatigue ist nicht Folge von anhaltender, exzessiver Belastung: <b>I.6</b> Trifft zu.<br><input type="checkbox"/> Fatigue erheblich gebessert durch Ausruhen: <b>I.7</b> Trifft nicht zu.                                                                                                                                                                                                 |
| <b>O</b>                                                                 | <b>Belastungsintoleranz</b><br>alle nachfolgenden Punkte müssen erfüllt sein:<br><input type="checkbox"/> Beschwerdezunahme nach Aktivitäten; vermind. Durchhalteverm.: alle 2 Punkte <b>II.8-9</b> $\geq 2$<br><input type="checkbox"/> Zustandsverschlechterung: <b>II.10</b> $\geq 14$ Std.                                                                                                                                                                                                                                                                                                 | <b>O</b>                                                              | <b>Belastungsintoleranz</b><br>alle nachfolgenden Punkte müssen erfüllt sein:<br><input type="checkbox"/> Beschwerdezunahme nach Aktivitäten; vermind. Durchhalteverm.: alle 2 Punkte: <b>II.8-9</b> $\geq 2$<br><input type="checkbox"/> Zustandsverschlechterung: <b>II.10</b> $>24$ Std.                                                                                                                                                                                                                                                                                                                                             |

| Pädiatrische Falldefinition für ME/CFS nach Jason LA et al. <sup>1</sup>                                                                                                                                                                                                                                                                                                                                                                                           |  | Klinisch-diagnostisches Arbeitsblatt nach Rowe PC et al. <sup>2</sup>                                                                                                                                                                                                                                                                                                                                                                                                                   |  |
|--------------------------------------------------------------------------------------------------------------------------------------------------------------------------------------------------------------------------------------------------------------------------------------------------------------------------------------------------------------------------------------------------------------------------------------------------------------------|--|-----------------------------------------------------------------------------------------------------------------------------------------------------------------------------------------------------------------------------------------------------------------------------------------------------------------------------------------------------------------------------------------------------------------------------------------------------------------------------------------|--|
| <input type="radio"/> <b>Schlaf</b><br>mind. 1 der nachfolgenden 5 Punkte muss erfüllt sein: <b>III.13-17</b> ≥2                                                                                                                                                                                                                                                                                                                                                   |  | <input type="radio"/> <b>Schlaf, Schmerz und neurokognitive Symptome</b><br>mind. 2 der 3 Kategorien müssen erfüllt sein:<br><input type="checkbox"/> mind. 1 der nachfolgenden 5 Punkte muss erfüllt sein: <b>III.13-17</b> ≥2<br><input type="checkbox"/> mind. 1 der nachfolgenden 6 Punkte muss erfüllt sein: <b>IV.18-21, V.22-43</b> ≥2<br><input type="checkbox"/> mind. 1 der nachfolgenden 8 Punkte muss erfüllt sein: <b>V.23-25, V.27-28, V.30, V.33</b> ≥2; <b>V.29: Ja</b> |  |
| <input type="radio"/> <b>Schmerzen</b><br>mind. 1 der nachfolgenden 4 Punkte muss erfüllt sein: <b>IV.18-21</b> ≥2                                                                                                                                                                                                                                                                                                                                                 |  |                                                                                                                                                                                                                                                                                                                                                                                                                                                                                         |  |
| <input type="radio"/> <b>Neurokognitive Manifestationen</b><br>mind. 2 der nachfolgenden 11 Punkte müssen erfüllt sein: <b>V.23-25, V.27-28, V.30-35</b> ≥2                                                                                                                                                                                                                                                                                                        |  |                                                                                                                                                                                                                                                                                                                                                                                                                                                                                         |  |
| <input type="radio"/> <b>Autonome, neuroendokrine und immunologische Manifestationen</b><br>mind. 2 der 3 Kategorien müssen erfüllt sein:<br><input type="checkbox"/> mind. 1 der nachfolgenden 5 Punkte muss erfüllt sein: <b>VI.44-47, VI.51</b> ≥2<br><input type="checkbox"/> mind. 1 der nachfolgenden 4 Punkte muss erfüllt sein: <b>VII.52-55</b> ≥2<br><input type="checkbox"/> mind. 1 der nachfolgenden 4 Punkte muss erfüllt sein: <b>VIII.56-59</b> ≥2 |  | <b>Autonome, neuroendokrine und immunologische Manifestationen</b><br><i>nicht in Diagnosekriterien nach Rowe PC et al. berücksichtigt</i>                                                                                                                                                                                                                                                                                                                                              |  |
| <input type="radio"/> Patient*in erfüllt die Kriterien für ME/CFS nach Jason LA et al.                                                                                                                                                                                                                                                                                                                                                                             |  | <input type="radio"/> Patient*in erfüllt die Kriterien für ME/CFS nach Rowe PC et al.                                                                                                                                                                                                                                                                                                                                                                                                   |  |
| <input type="radio"/> Patient*in erfüllt <u>nicht</u> die Kriterien für ME/CFS nach Jason LA et al.                                                                                                                                                                                                                                                                                                                                                                |  | <input type="radio"/> Patient*in erfüllt <u>nicht</u> die Kriterien für ME/CFS nach Rowe PC et al.                                                                                                                                                                                                                                                                                                                                                                                      |  |

<sup>1</sup>Jason LA, Jordan K, Miike T, Bell DS, Lapp C, Torres-Harding S, Rowe K, Gurwitt A, De Meirleir K, Van Hoof ELS. Pediatric Case Definition for Myalgic Encephalomyelitis and Chronic Fatigue Syndrome. Journal of Chronic Fatigue Syndrome 2006; 13:1-44. doi: 10.1300/J092v13n02\_01.

<sup>2</sup>Rowe PC, Underhill RA, Friedman KJ, Gurwitt A, Medow MS, Schwartz MS, Speight N, Stewart JM, Vallings R, Rowe KS. Myalgic Encephalomyelitis/Chronic Fatigue Syndrome Diagnosis and Management in Young People: A Primer. Front Pediatr. 2017;5:121. doi: 10.3389/fped.2017.00121.

\* In der Originalpublikation von Rowe PC et al.<sup>2</sup> ist eine Krankheitsdauer von mind. 6 Monaten für die Diagnosestellung gefordert. Bei einer Dauer <6 Monate wird dort nur empfohlen, den dringenden Verdacht zu äußern. Wir empfehlen bei Kindern und Jugendlichen bereits eine Diagnosestellung nach einer Krankheitsdauer von 3 Monaten, um sie frühzeitig symptomorientiert zu versorgen.



# Munich Berlin Symptom Questionnaire (MBSQ) – Auswertungsbogen Nr. 2 für Kinder und Jugendliche (0-17 Jahre) bei Verdacht auf ME/CFS

Name: \_\_\_\_\_ Vorname: \_\_\_\_\_  
Geburtsdatum: \_\_\_\_\_  
Ausfülldatum: \_\_\_\_\_

Name (Arzt\*in): \_\_\_\_\_  
Datum (Arzt\*in): \_\_\_\_\_  
Einrichtung: \_\_\_\_\_

Nur wenn Häufigkeit und Schweregrad mit  $\geq 2$  angegeben werden, geht der jeweilige Punkt positiv in die Auswertung ein.  
ME/CFS ist eine Ausschlussdiagnose, die im Falle neuer klinischer Aspekte reevaluiert werden muss.

| Kanadische Konsensus-Kriterien (CCC) <sup>3</sup> |                                                                                                                                                                                                                                                                                                                                                                                                                                                                                                     | Kriterien des Institute of Medicine (IOM) <sup>4</sup> |                                                                                                                                                                                                                                                                                                                                                                                                                                                                                                                 |
|---------------------------------------------------|-----------------------------------------------------------------------------------------------------------------------------------------------------------------------------------------------------------------------------------------------------------------------------------------------------------------------------------------------------------------------------------------------------------------------------------------------------------------------------------------------------|--------------------------------------------------------|-----------------------------------------------------------------------------------------------------------------------------------------------------------------------------------------------------------------------------------------------------------------------------------------------------------------------------------------------------------------------------------------------------------------------------------------------------------------------------------------------------------------|
| <b>O</b>                                          | <b>Krankheitsdauer (Tag des Krankheitsbeginns: __.__.____)</b><br>Die Symptomatik besteht seit mindestens <b>3 Monaten</b> .                                                                                                                                                                                                                                                                                                                                                                        | <b>O</b>                                               | <b>Krankheitsdauer (Tag des Krankheitsbeginns: __.__.____)</b><br>Die Symptomatik besteht seit mindestens <b>3 Monaten.**</b>                                                                                                                                                                                                                                                                                                                                                                                   |
| <b>O</b>                                          | <b>Anamnese, körperliche Untersuchung und Differentialdiagnostik</b><br><input type="checkbox"/> ergaben keinen Anhalt für eine andere Ursache der Beschwerden (insbes. kein Anhalt für <i>M. Addison, M. Cushing, Hypo-/ Hyperthyreose, Anämie, Hämochromatose, Diabetes mellitus, hämatoonkologische, rheumatologische und behandelbare Schlafkrankungen</i> )<br><br><input type="checkbox"/> Die Symptome bestehen erst seit Erkrankungsbeginn oder haben in Häufigkeit und Schwere zugenommen. | <b>O</b>                                               | <b>Anamnese, körperliche Untersuchung und Differentialdiagnostik</b><br><input type="checkbox"/> ergaben keinen Anhalt für eine andere Ursache der Beschwerden.<br><br><input type="checkbox"/> Die Symptome bestehen erst seit Erkrankungsbeginn oder haben in Häufigkeit und Schwere zugenommen.                                                                                                                                                                                                              |
| <b>O</b>                                          | <b>Fatigue</b><br>alle nachfolgenden Punkte müssen erfüllt sein:<br><input type="checkbox"/> Fatigue: <b>I.1</b> $\geq 2$<br><input type="checkbox"/> Einschränkungen: mind. 1 von 3 Punkten: <b>I.2-4</b> $\geq 2$<br><input type="checkbox"/> Fatigue neu begonnen: <b>I.5</b> Trifft zu.                                                                                                                                                                                                         | <b>O</b>                                               | <b>Fatigue</b><br>alle nachfolgenden Punkte müssen erfüllt sein:<br><input type="checkbox"/> Fatigue: <b>I.1</b> $\geq 2$<br><input type="checkbox"/> Einschränkungen: mind. 1 von 3 Punkten: <b>I.2-4</b> $\geq 2$<br><input type="checkbox"/> Fatigue neu begonnen: <b>I.5</b> Trifft zu.<br><input type="checkbox"/> Fatigue ist nicht Folge von anhaltender, exzessiver Belastung: <b>I.6</b> Trifft zu.<br><input type="checkbox"/> Fatigue deutlich gebessert durch Ausruhen: <b>I.7</b> Trifft nicht zu. |
| <b>O</b>                                          | <b>Belastungsintoleranz</b><br>alle nachfolgenden Punkte müssen erfüllt sein:<br><input type="checkbox"/> Beschwerdezunahme nach Aktivitäten; vermind. Durchhalteverm.: alle 2 Punkte <b>II.8-9</b> $\geq 2$<br><input type="checkbox"/> Zustandsverschlechterung: <b>II.10</b> $\geq 14$ Std.*                                                                                                                                                                                                     | <b>O</b>                                               | <b>Belastungsintoleranz</b><br>alle 2 nachfolgenden Punkte müssen erfüllt sein: <b>II.8-9</b> $\geq 2$                                                                                                                                                                                                                                                                                                                                                                                                          |

| Kanadische Konsensus-Kriterien (CCC) <sup>3</sup>                                                                                                                                                                                                                                                                                                                                                                                                                                                                                                                                                                                                                             |  | Kriterien des Institute of Medicine (IOM) <sup>4</sup>                                                                                                                                                                                                                                                                                                                                                                                                                                                      |  |
|-------------------------------------------------------------------------------------------------------------------------------------------------------------------------------------------------------------------------------------------------------------------------------------------------------------------------------------------------------------------------------------------------------------------------------------------------------------------------------------------------------------------------------------------------------------------------------------------------------------------------------------------------------------------------------|--|-------------------------------------------------------------------------------------------------------------------------------------------------------------------------------------------------------------------------------------------------------------------------------------------------------------------------------------------------------------------------------------------------------------------------------------------------------------------------------------------------------------|--|
| <b>O Schlaf</b><br>mind. 1 der nachfolgenden 5 Punkte muss erfüllt sein: <b>III.13-17</b> ≥2                                                                                                                                                                                                                                                                                                                                                                                                                                                                                                                                                                                  |  | <b>O Schlaf</b><br>der nachfolgende Punkt muss erfüllt sein: <b>III.13</b> ≥2                                                                                                                                                                                                                                                                                                                                                                                                                               |  |
| <b>O Schmerzen</b><br>mind. 1 der nachfolgenden 3 Punkte muss erfüllt sein: <b>IV.18-20</b> ≥2<br>(ausgenommen Bauchschmerzen)                                                                                                                                                                                                                                                                                                                                                                                                                                                                                                                                                |  | <b>Schmerzen</b><br><i>nicht in IOM-Kriterien berücksichtigt</i>                                                                                                                                                                                                                                                                                                                                                                                                                                            |  |
| <b>O Neurokognitive Manifestationen</b><br>mind. 2 der nachfolgenden Symptomgruppen müssen erfüllt sein:<br><input type="checkbox"/> Verwirrung: <b>V.22</b> ≥2<br><input type="checkbox"/> Konzentration u/o Gedächtnis: 1 der 2 nachfolgenden Punkte: <b>V.24-25</b> ≥2<br><input type="checkbox"/> Orientierung: <b>V.26</b> ≥2<br><input type="checkbox"/> Verständnis u/o Wortfindung: 1 der 2 nachfolgenden Punkte: <b>V.27-28</b> ≥2<br><input type="checkbox"/> Wahrnehmung und Überlastungsphänomene: 1 der 5 nachfolgenden Punkte: <b>V.36, V.40-43</b> ≥2<br><input type="checkbox"/> Koordination und Muskulatur: 1 der 3 nachfolgenden Punkte: <b>V.37-39</b> ≥2 |  | <b>O Neurokognitive und autonome Manifestationen</b><br>mind. 1 der folgenden 2 Kategorien muss erfüllt sein:<br><input type="checkbox"/> die folgenden beiden Symptomgruppen müssen erfüllt sein:<br><input type="checkbox"/> mind. 1 der nachfolgenden 6 Punkte muss erfüllt sein: <b>V.23-25, V.27-28, V.37</b> ≥2<br><input type="checkbox"/> der folgende Punkt muss erfüllt sein: <b>V.29 Ja</b><br><input type="checkbox"/> Mind. 1 der nachfolgenden 2 Punkte muss erfüllt sein: <b>VI.46-47</b> ≥2 |  |
| <b>O Autonome, neuroendokrine und immunologische Manifestationen</b><br>mind. 2 der 3 Kategorien müssen erfüllt sein:<br><input type="checkbox"/> mind. 1 der nachfolgenden 8 Punkte muss erfüllt sein: <b>VI.44-51</b> ≥2<br><input type="checkbox"/> mind. 1 der nachfolgenden 4 Punkte muss erfüllt sein: <b>VII.52-55</b> ≥2<br><input type="checkbox"/> mind. 1 der nachfolgenden 4 Punkte muss erfüllt sein: <b>VIII.56-57, VIII.59-60</b> ≥2                                                                                                                                                                                                                           |  | <b>Neuroendokrine und immunologische Manifestationen</b><br><i>nicht in IOM-Kriterien berücksichtigt</i>                                                                                                                                                                                                                                                                                                                                                                                                    |  |
| <b>O Patient*in erfüllt die Kanadischen Konsensus-Kriterien für ME/CFS</b>                                                                                                                                                                                                                                                                                                                                                                                                                                                                                                                                                                                                    |  | <b>O Patient*in erfüllt die IOM-Kriterien für ME/CFS</b>                                                                                                                                                                                                                                                                                                                                                                                                                                                    |  |
| <b>O Patient*in erfüllt die Kanadischen Konsensus-Kriterien für ME/CFS <u>nicht</u></b>                                                                                                                                                                                                                                                                                                                                                                                                                                                                                                                                                                                       |  | <b>O Patient*in erfüllt die IOM-Kriterien für ME/CFS <u>nicht</u></b>                                                                                                                                                                                                                                                                                                                                                                                                                                       |  |

<sup>3</sup> Carruthers BM, Jain AK, De Meirleir KL, Peterson DL, Klimas NG, Lerner, AM, Bested AC, Flor-Henry P, Joshi P, Powles ACP, Sherkey JA, van de Sande MI. Myalgic Encephalomyelitis/Chronic Fatigue Syndrome. Journal of Chronic Fatigue Syndrome 2003;11:7-115. doi: 10.1300/J092v11n01\_02.

<sup>4</sup> Clayton EW. Beyond Myalgic Encephalomyelitis/Chronic Fatigue Syndrome: An IOM Report on Redefining an Illness. JAMA. 2015;313(11):1101–1102. doi:10.1001/jama.2015.1346.

\* In der Originalpublikation von Carruthers BM et al.<sup>3</sup> ist eine PEM-Dauer von >24 Stunden gefordert. Nach aktuellem internationalen Forschungsstand empfehlen wir jedoch die Diagnosestellung schon ab einer PEM-Dauer von ≥14 Stunden. siehe a) Cotler J et al. Diagnostics. 2018;8(3):66. doi.org/10.3390/diagnostics8030066 und b) Kedor C et al., Nat Commun. 2022;13(1):5104. doi: 10.1038/s41467-022-32507-6. Erratum in: Nat Commun. 2022;13(1):6009.

\*\* In der Originalpublikation von Clayton EW et al.<sup>4</sup> ist eine Krankheitsdauer von mind. 6 Monaten für die Diagnosestellung gefordert. Wir empfehlen bei Kindern und Jugendlichen bereits eine Diagnosestellung nach einer Krankheitsdauer von 3 Monaten, um sie frühzeitig symptomorientiert zu versorgen.
